# Supplementary material for: Proteomic Analysis Reveals the Leaf Color Regulation Mechanism in Chimera Hosta “Gold Standard” Leaves
Source: MDPI journal article supplement (doi:10.3390/ijms17030346), 2016-03-08
Supplement: s1 [file s1]

# Supplementary Materials: The Leaf Color Regulation Mechanism in Chimera *Hosta* “Gold Standard” Leaves Revealed from Proteomic Analysis

Juanjuan Yu, Jinzheng Zhang, Qi Zhao, Yuelu Liu, Sixue Chen, Hongliang Guo, Lei Shi and Shaojun Dai

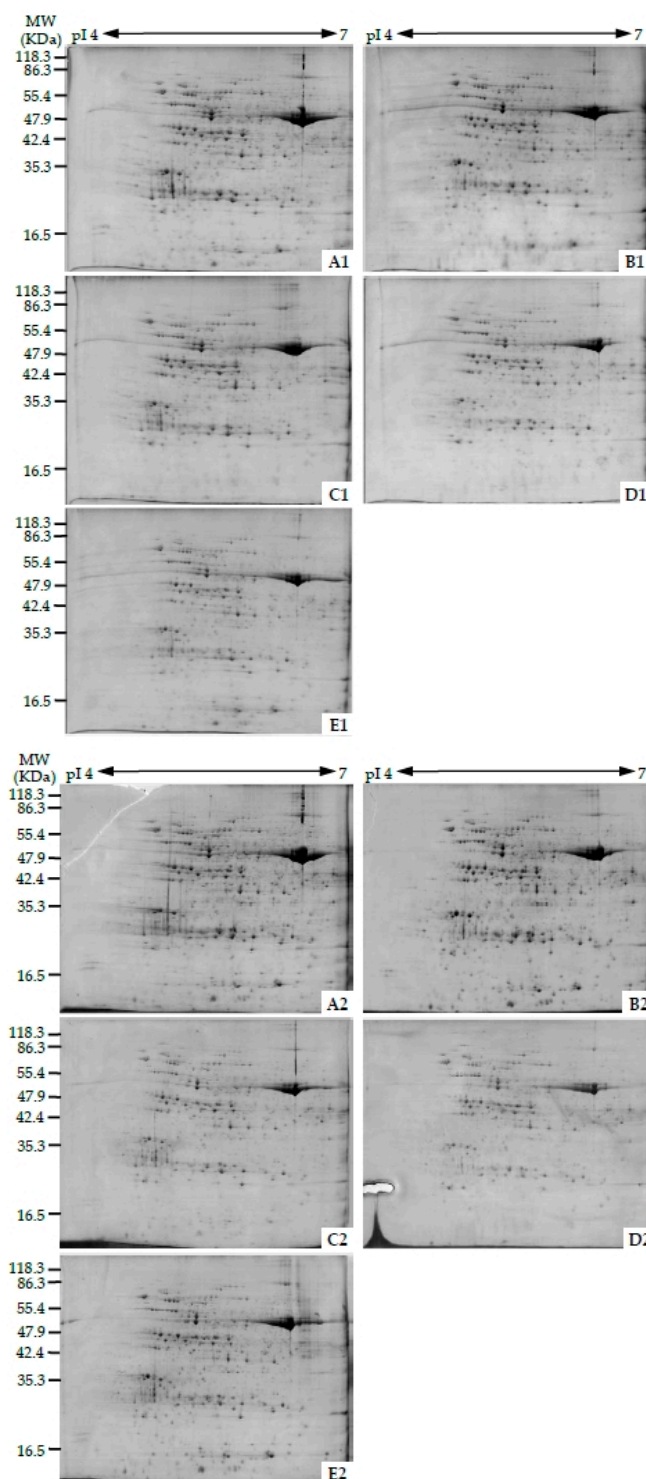

Figure S1. Cont.

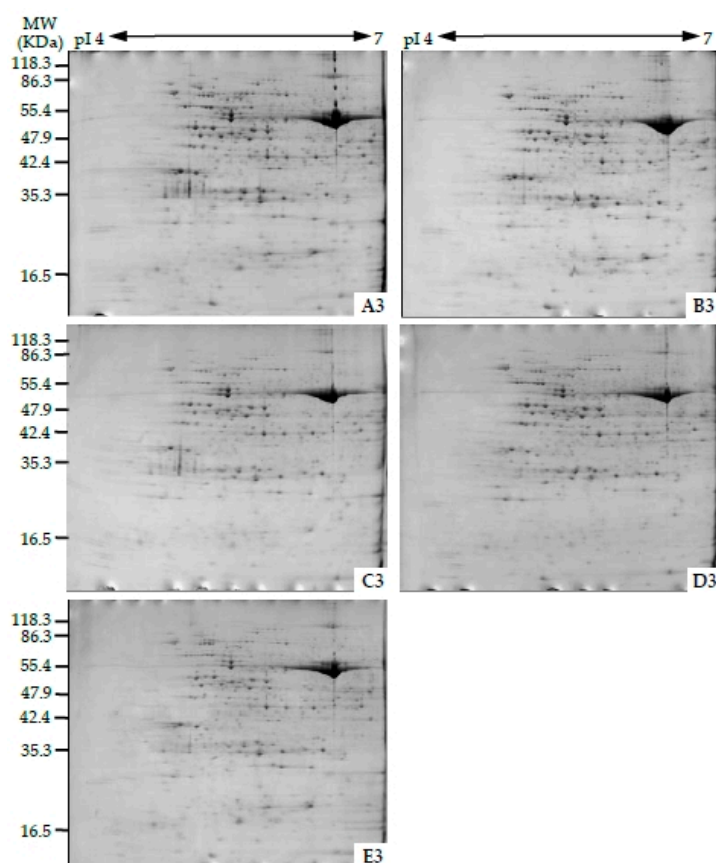

**Figure S1.** Three biological replicates of 2-DE gels of proteins extracted from various leaf regions in different development stages of *Hosta* “Gold Standard”. (A1–A3) young leaf margin (YLM); (B1–B3) young leaf center (YLC); (C1–C3) mature leaf margin (MLM); (D1–D3) mature leaf center (MLC); (E1–E3) leaf under excess nitrogen fertilization (LENF). Proteins were separated on 24 cm IPG strips (pH 4–7 linear gradient) using isoelectric focusing (IEF) in the first dimension, followed by 12.5% SES-PAGE gels in the second dimension. The 2-DE gel was stained with Coomassie Brilliant Blue. Molecular weight (Mw) in kilodaltons (kDa) and pI of proteins are indicated on the left and top of the gel, respectively.

|                           |                                                                                                                                                                 |          |
|---------------------------|-----------------------------------------------------------------------------------------------------------------------------------------------------------------|----------|
| gi 71361904 spot 795 GS1c | MALLTDLNLDLTDSTEKI IAEYIWIWGGSGMDLRKARTLPGPVTDP SKLPKWN YDGSSTGQAPGEDSEVILYPQAI FKD                                                                             | 80       |
| gi 71361904 spot 806 GS1c | MALLTDLNLDLTDSTEKI IAEYIWIWGGSGMDLRKARTLPGPVTDP SKLPKWN YDGSSTGQAPGEDSEVILYPQAI FKD                                                                             | 80       |
| consensus                 | malltdlnldltdstekiaeyiwiggsgmdlrskartlpgpvt dpsklpkwnydgsgtgqapgedsevilypqai fkd                                                                                |          |
| gi 71361904 spot 795 GS1c | PFRKGNNILVMDCYTPAGVPIPTNKRYNAV KIFSNPDVAKEEPWY GIEQ EYTL LQKDINWPLGWPVGGFPGPGQGPYYCS                                                                            | 160      |
| gi 71361904 spot 806 GS1c | PFRKGNNILVMDCYTPAGVPIPTNKRYNAV KIFSNPDVAKEEPWY GIEQ EYTL LQKDINWPLGWPVGGFPGPGQGPYYCS                                                                            | 160      |
| consensus                 | pfrkgnnilvmcdcytpagvp iptnkrynavkifsnpdvakeepwygieqeytllqkdinwplgwpvggfp gpgqgpyy cs                                                                            |          |
| gi 71361904 spot 795 GS1c | IGADKSFGRDIVDSHYKACLFAGVNI SINGINGEVM PGQW E FQVGPTVGISAGDQVWVARYLLERITEIAGVVVTFDPKPIP                                                                          | 240      |
| gi 71361904 spot 806 GS1c | IGADKSFGRDIVDSHYKACLFAGVNI SINGINGEVM PGQW E FQVGPTVGISAGDQVWVARYLLERITEIAGVVVTFDPKPIP                                                                          | 240      |
| consensus                 | igadksfgrdivdshy k a c l f a g v n i s i n g i n g e v m p g q w e f q v g p t v g i s a g d q v w v a r y l l e r i t e i a g v v t f d p k p i p              |          |
| gi 71361904 spot 795 GS1c | GDWNGAGAHTNYSTESMRKDG GFKVIVDAVEK LK LKHKEHIAAYGEGNERRLTGKHETADINTFSWGVANRGASVRVGRE                                                                             | 320      |
| gi 71361904 spot 806 GS1c | GDWNGAGAHTNYSTESMRKDG GFKVIVDAVEK LK LKHKEHIAAYGEGNERRLTGKHETADINTFSWGVANRGASVRVGRE                                                                             | 320      |
| consensus                 | gdwn g a g a h t n y s t e s m r k d g g f k v i v d a v e k l k l k h k e h i a a y g e g n e r r l t g k h e t a d i n t f s w g v a n r g a s v r v g r e    |          |
| gi 71361904 spot 795 GS1c | TEQNGKGYFEDRRPASNM DPYVVTSMIAETTILWK                                                                                                                            | 355      |
| gi 71361904 spot 806 GS1c | TEQNGKGYFEDRRPASNM DPYVVTSMIAETTILWK                                                                                                                            | 355      |
| consensus                 | teqngkgy fedrrpasnm dpyvvt smiaett ilwk                                                                                                                         | <b>A</b> |
| gi 194396261 spot 338 TK  | MAS S S L T L S Q A I L S R S V P R H G S A S S S O L S P S S I T F S G L K S N P N I T T S R R R T P S S A A A A V V R S P A T R A S A A T E T I E K T E       | 80       |
| gi 224063766 spot 346 TK  | MAS S S L T L S Q A I L A R A V S H N A I D N L R D S R L S L V S L P A F S G L K S T I C T A T R A T T T S R R R R V S S Q R V R A A V E T L D A T E           | 80       |
| consensus                 | mas s s l t l s q a l r v s s s o l s p s s i t f s g l k s n p n i t t s r r r v s s r a a t e                                                                 |          |
| gi 194396261 spot 338 TK  | T L V L K S V N T I R F L A I D A V E K A N S G H P G L P M G C A P M G H I L Y D E V M R Y N P K N P Y W F N R D R F V L S A G H G C M L Q Y A L L H L A G Y   | 160      |
| gi 224063766 spot 346 TK  | T S L V E K S V N T I R F L A I D A V E K A N S G H P G L P M G C A P M G H I L Y D E V M R Y N P K N P Y W F N R D R F V L S A G H G C M L Q Y A L L H L A G Y | 160      |
| consensus                 | t l v k s v n t i r f l a i d a v e k a n s g h p g l p m g c a p m g h i l y d e v m r y n p k n p y w f n r d r f v l s a g h g c m l q y a l l h l a g y     |          |
| gi 194396261 spot 338 TK  | D A V R E E D L K S F R Q W G S R T P G H P E N F E T P G V E V T T G P L G Q G I A N A V G L A L V E K H L A A R N K P D A E I V D H Y T Y V I L G D G C Q M   | 240      |
| gi 224063766 spot 346 TK  | T S V K E E D L K S F R Q W G S R T P G H P E N F E T P G V E V T T G P L G Q G I A N A V G L A L V E K H L A A R N K P D N E I V D H Y T Y V I L G D G C Q M   | 240      |
| consensus                 | d v e e d l k s f r q w g s t p g h p e n f e t p g v e v t t g p l g q g i a n a v g l a l e k h l a a r n k p d a e i v d h y t y v i l g d g c q m           |          |
| gi 194396261 spot 338 TK  | E G I S Q E A C S L A C H W G L G K L I A F Y D D N H I S I D G D T E I A F T E D V C A R F E L G W H V I W K N G N T G Y D E I R A A I K E A K V I T D K P     | 320      |
| gi 224063766 spot 346 TK  | E G I S N E A C S L A A H W G L G K L I A F Y D D N H I S I D G D T E I A F T E D V K R F E L G W H V I W K N G N T G Y D E I R A A I K E A K S V R D K P       | 320      |
| consensus                 | egis q e a c s l a h w g l g k l i a f y d d n h i s i d g d t e i a f t e d v r f e l g w h v i w k n g n t g y d e i r a a i k e a k v d k p                  |          |
| gi 194396261 spot 338 TK  | T I K V T T T I G G S P N K A N S Y S V H G S A L G A K E V D A T R N L G W P Y E P F H V P E D V K H W S R H V T E G A A E A G W N T K F A E Y E K K           | 400      |
| gi 224063766 spot 346 TK  | T I K V T T T I G G S P N K A N S Y S V H G S A L G A K E V D A T R N L G W P Y E P F H V P E D V K H W S R H T P A G A A F A E A W N K F A E Y E K K           | 400      |
| consensus                 | t i k v t t t i g g s p n k a n s y s v h g s a l g a k e v a t r n l g w p y e p f h v p e d v k h w s r h g a a e a w n k f a e y e k k                       |          |
| gi 194396261 spot 338 TK  | Y E E E A A E L K S I T T G E L P A G W E K A L P T Y T P E S P A D A T R N L S Q Q N L N A L V K V L P G L G G S A D L A S S N M T L K M F G D F Q K T P       | 480      |
| gi 224063766 spot 346 TK  | Y S E E A A E L K S I A N G E L P A G W E K A L P T Y T P E S P A D A T R N L S Q Q N L N A L V K V L P G L G G S A D L A S S N M T L K M F G D F Q K T P       | 480      |
| consensus                 | y e e a a e l k s i g e l p a g w e k a l p t y t p e s p a d a t r n l s q q n l n a l v k v l p g l g g s a d l a s s n m t l k m f g d f q k t p             |          |
| gi 194396261 spot 338 TK  | E E R N V R F G V R E H G M G A I C N G I A L H S P G L I P Y C A T F F V F T D Y M R A M R I S A L S E A G V I Y V M T H D S I G L G E D G P T H Q P I E H L   | 560      |
| gi 224063766 spot 346 TK  | E E R N V R F G V R E H G M G A I C N G I A L H C P G L I P Y C A T F F V F T D Y M R A M R I S A L S E A G V I Y V M T H D S I G L G E D G P T H Q P I E H L   | 560      |
| consensus                 | e e r n r f g v r e h g m g a i c n g i a l h p g l i p y c a t f f v f t d y m r a m r i s a l s e a g v i y v m t h d s i g l g e d g p t h q p i e h l       |          |
| gi 194396261 spot 338 TK  | A S F R A M P N I L M R P A D G N E T A G A Y K V A V I K M K T P S I L A L S R Q K L P O L A G S S I E C A K G G Y I L S D N S S C N K P D V I L I G T G S     | 640      |
| gi 224063766 spot 346 TK  | A S F R A M P N I L M R P A D G N E T A G A Y K V A V I N K R P S I L A L S R Q K L P O L A G T S I E C V K G G Y I L S D N S S C N K P D V I L I G T G S       | 640      |
| consensus                 | a s f r a m p n i l m r p a d g n e t a g a y k v a v i k p s i l a l s r q k l p o l g s i e c k g g y i s d n s s n k p d v i l i g t g s                     |          |
| gi 194396261 spot 338 TK  | E L E I A V K A A E L R K E G K A V R V V S F V W E L F E Q S A D Y K E S V L E S S V T A R V S I E A G S T F G W E K Y V G S K G K A I G I D R F G A S A       | 720      |
| gi 224063766 spot 346 TK  | E L E I A K A A E L R K E G K A V R V V S F V S N E L F E Q S D A Y K E S V L E A A V E A R V S I E A G S T F G W E K I V G K G K A I G I D R F G A S A         | 720      |
| consensus                 | e l e i a k a a e l r k e g k a v r v v s f v w e l f e q s a d y k e s v l e s s v t a r v s i e a g s t f g w e k y v g s k g k a i g i d r f g a s a         |          |
| gi 194396261 spot 338 TK  | P A G K I Y K E Y G I T E A V V A A A K V                                                                                                                       | 743      |
| gi 224063766 spot 346 TK  | P A G K I Y K E Y G I T E A V T A A A K E V                                                                                                                     | 743      |
| consensus                 | p a g k i y k e y g i t e a v a a a k v                                                                                                                         | <b>B</b> |

Figure S2. Cont.

|                                     |                                                                                                                                                  |     |
|-------------------------------------|--------------------------------------------------------------------------------------------------------------------------------------------------|-----|
| gi 242090109 spot 459 RBP- $\alpha$ | .....MASANAI <del>STASLISPLSQ</del> GRARRARNGRSQRTFVVRBAKDIATFDOK..SRAAL                                                                         | 51  |
| gi 223948025 spot 472 RBP- $\beta$  | .....MASTFGATSTVGLMAA.PTGKNVRLQRRANFRVKAAKELVFNKDGSAIKKL                                                                                         | 50  |
| gi 225442531 spot 476 RBP- $\beta$  | MASSFATMSSSIGYFTSSSSHTMDKKFLGSSRRLESFASISANSFEGRKQSMVLQKRCSFPKVRAMAKELVFNKDGSAIKKL                                                               | 80  |
| consensus                           | v ak f l                                                                                                                                         |     |
| gi 242090109 spot 459 RBP- $\alpha$ | CAGVEKLANAVGVTLGPRGRNVVLD.EYGSPPVNDGVITARA <del>TELYDP</del> ENAGALIREVASKTND <del>SAGD</del> GTITIASVLA                                         | 130 |
| gi 223948025 spot 472 RBP- $\beta$  | CTGVNKLADLVGVTLGPKGRNVVLESKYGSPKIVNDGVTVAREVELDDPVENIGARLVROAPAKTND <del>LAGD</del> GTITIVVLA                                                    | 130 |
| gi 225442531 spot 476 RBP- $\beta$  | CTGVNKLADLVGVTLGPKGRNVVLESKYGSPKIVNDGVTVAREVELDDPVENIGARLVROAPAKTND <del>LAGD</del> GTITIVVLA                                                    | 160 |
| consensus                           | q gv kla vgvtlgp grnvvl ygspp vndgvt ar el dp en ga l r a ktnd agdgttt vla                                                                       |     |
| gi 242090109 spot 459 RBP- $\alpha$ | REITIKLCLLSVTSGANPVSLKKGIDKTVQGLICELENKARPKGGGDIKAVASISAGNDEFTGSMIAEATDKVGPDPVLS                                                                 | 210 |
| gi 223948025 spot 472 RBP- $\beta$  | QGLIABGVKVVAAGANPVQITRGIETAKAVBELRKLKSKVEEDS.ELADVAAVSAGNNYIEIGNMIAEAMSVKGRKGVVT                                                                 | 209 |
| gi 225442531 spot 476 RBP- $\beta$  | QGLITEGVKVVAAGANPVQITRGIETAKAVBELRKLKSKVEEDS.ELADVAAVSAGNNYIEIGNMIAEAMSVKGRKGVVT                                                                 | 239 |
| consensus                           | i g v ganpv gi t l el v va sagn g miaea vg gv                                                                                                    |     |
| gi 242090109 spot 459 RBP- $\alpha$ | TESSSEFTTVEVBEGMEDRGIYSQFVTNLEKSI <del>VEENAKVLT</del> TDCKISSIKEIL <del>PILEKTTQLRAEL</del> IIAEDITG                                            | 290 |
| gi 223948025 spot 472 RBP- $\beta$  | TEEGKSENFLVVEGMQDRGIYSFVFTDSEKMAVE <del>ENCKLLV</del> PKITNARDLIN <del>VEDAIRGAE</del> PIIIIAEDIEQ                                               | 289 |
| gi 225442531 spot 476 RBP- $\beta$  | TEEGKSAENNLVVEGMQDRGIYSFVFTDSEKMAVE <del>ENCKLLV</del> PKITNARDLIN <del>VEDAIRGAE</del> PIIIIAEDIEQ                                              | 319 |
| consensus                           | e s e v egm drgyisp fvt ek e en k l d ki le p iiaedi                                                                                             |     |
| gi 242090109 spot 459 RBP- $\alpha$ | EALATLVVNKLRGILNVAARKAPSGFERKKA <del>VL</del> ODIAITGA <del>EF</del> LAKDLGLLVEN <del>TEAQLGTARKVT</del> HQTITTTIADA                             | 370 |
| gi 223948025 spot 472 RBP- $\beta$  | EALATLVVNKLRGSLKTAARKAPSGFERKKT <del>QYLD</del> DAITGTATVIRDEVGLSLDKADK <del>SVLGTAAK</del> VLTKESTTIVGDS                                        | 369 |
| gi 225442531 spot 476 RBP- $\beta$  | EALATLVVNKLRGALKTAARKAPSGFERKKS <del>QYLD</del> DAITGTATVIREEVGLSLDKAE <del>EV</del> LGHAAKVLTKDITTTIVGDS                                        | 399 |
| consensus                           | ealatlvvnklrg l aa kap fger l diai tg gl a lg a kv tt d                                                                                          |     |
| gi 242090109 spot 459 RBP- $\alpha$ | ASKDEIQARVA <del>LKKELAE</del> TSVYDTEKLA <del>ERIAKL</del> AGGVAVIRVGAATETEL <del>EDRQLR</del> IEDAKNATEAAIEEGIVPGGG                            | 450 |
| gi 223948025 spot 472 RBP- $\beta$  | STQEEVTKRVACIKNLIEAAEQYEKEKLN <del>ERIAKL</del> AGGVAVICVGAATETEL <del>KEKKLR</del> VEDA <del>NATKA</del> AVEEGIVVGGG                            | 449 |
| gi 225442531 spot 476 RBP- $\beta$  | STQEA <del>VNKR</del> VACIRNLVEAADQYEKEKLN <del>ERIAKL</del> SGGVAVICVGAATETEL <del>KEKKLR</del> VEDA <del>NATKA</del> AVEEGIVVGGG               | 479 |
| consensus                           | rvaq y ekl eriakl ggavai vga tetel lr eda nat aa eegiv ggg                                                                                       |     |
| gi 242090109 spot 459 RBP- $\alpha$ | TAYVHLSTVPSIK <del>EKTE</del> EDPRLGADTIQKALVA <del>SLIA</del> NAGVGE <del>EV</del> VVEKIKDS.VWEVGYNAMTDTYENIT <del>EAGV</del>                   | 529 |
| gi 223948025 spot 472 RBP- $\beta$  | CTLLRLAAKVDAIK <del>TE</del> LENDEQKVGA <del>ITVRRAL</del> SYPLKLI <del>ARNAGV</del> NGSVVTEKVLSDNPKYGYNA <del>PTQ</del> QVEDIMPA <del>GI</del>  | 529 |
| gi 225442531 spot 476 RBP- $\beta$  | CTLLRLAAKVDAIK <del>TE</del> LENDEQKVGA <del>ITVRRAL</del> SYPLKLI <del>ARNAGV</del> NGSVVIEKVLSSDNPKYGYNA <del>PTQ</del> QVEDIMPA <del>GI</del> | 559 |
| consensus                           | l v ik ga i al p lia nagv g vv ek gyna t ye l ag                                                                                                 |     |
| gi 242090109 spot 459 RBP- $\alpha$ | IDP <del>AKVRC</del> ALONAASVAGMVL <del>LTQAL</del> VVEKPK <del>KFQ</del> .VAESEGS <del>LAV</del>                                                | 577 |
| gi 223948025 spot 472 RBP- $\beta$  | IDP <del>TKVRC</del> OLEEHAASVAK <del>TFL</del> ASD <del>VVV</del> VDIKEE <del>EAAP</del> VANEMD <del>NSGYG</del>                                | 578 |
| gi 225442531 spot 476 RBP- $\beta$  | IDP <del>AKVRC</del> OLEEHAASVART <del>FL</del> ASDA <del>VVV</del> VDIKEE <del>EP</del> IPAGNEMD <del>NSGYG</del>                               | 608 |
| consensus                           | idp kv rc l aasva lt vv p p s                                                                                                                    |     |

**C**

|                           |                                                                                                                                                                                                        |     |
|---------------------------|--------------------------------------------------------------------------------------------------------------------------------------------------------------------------------------------------------|-----|
| gi 255646270 spot 832 PRK | MAACTVYSTQSLSTNCSISTPSKTQLSFFHQKQVFWRNSSKKGSCSSRRSYVITCAAGDSQ <del>TV</del> VIGLAADSGCGKSTFMR                                                                                                          | 80  |
| gi 1885326 spot 840 PRK   | .....AGDSQ <del>TV</del> VIGLAADSGCGKSTFMR                                                                                                                                                             | 24  |
| consensus                 | agdsqt viglaadsgcgkstfmr                                                                                                                                                                               |     |
| gi 255646270 spot 832 PRK | RLTSVFGGAAEPPKGGNPDSENTLISD <del>TTT</del> VICLDDYHSLDRTGRKEKGV <del>TALDE</del> BRANDFDLMYEQVKA <del>KDG</del> VAVEKPIY                                                                               | 160 |
| gi 1885326 spot 840 PRK   | RLTSVFGGAAEPPKGGNPDSENTLISD <del>TTT</del> VICLDDYHSLDRTGRKEKGV <del>TALDE</del> BRANDFDLMYEQVKA <del>KDG</del> SKVCKPIY                                                                               | 104 |
| consensus                 | rltsvfggaaepkgnpdsentlisdtttvi clddyhslrdrtgrkekgv taldp andfdlmyeqvka kdg v kpiy                                                                                                                      |     |
| gi 255646270 spot 832 PRK | NHVTGLLDPELIKPPKILVIEGLHPMD <del>SRVR</del> LLDFSIYLDISNEVKFAWKIQ <del>RDMA</del> ERGHSL <del>ESIKASIE</del> ARKPD <del>FE</del>                                                                       | 240 |
| gi 1885326 spot 840 PRK   | NHVTGLLDPELIKPPKILVIEGLHPMD <del>SRVR</del> LLDFSIYLDISNEVKFAWKIQ <del>RDMA</del> ERGHSL <del>ESIKASIE</del> ARKPD <del>FE</del>                                                                       | 184 |
| consensus                 | nhvtgll d pelikppkilvieglhpm dsrvr lldfs iyl disnevkfawki qrdmaerghslesikasiearkpdfe                                                                                                                   |     |
| gi 255646270 spot 832 PRK | AYIDPQKQYADAVIEVLPTQLIPDDNEGKILRVRLIQ <del>RGV</del> KYFSPVYLFDDGSTISWIPCGRKL <del>TC</del> SYPGIKFFYGPET                                                                                              | 320 |
| gi 1885326 spot 840 PRK   | AYIDPQKQYADAVIEVLPTQLIPDDNEGKILRVRLIQ <del>RGV</del> KYFSPVYLFDDGSTISWIPCGRKL <del>TC</del> SYPGIKFFYGPET                                                                                              | 264 |
| consensus                 | ayidpqkyadavievlptqlipddnegkilrvrliq rgv kyf spvylfd gstiswipcgrkl tcsypgikffygpet                                                                                                                     |     |
| gi 255646270 spot 832 PRK | YKGNEV <del>LV</del> VEMDGGQFDR <del>LD</del> ELIYVESHL <del>SNLS</del> TKFYGEV <del>TQ</del> QMLKHADFP <del>GS</del> NNGTG <del>GF</del> FQ <del>TI</del> VGLKIR <del>DL</del> VEQLTAS <del>KAE</del> | 400 |
| gi 1885326 spot 840 PRK   | YKGNEV <del>LV</del> VEMDGGQFDR <del>LD</del> ELIYVESHL <del>SNLS</del> TKFYGEV <del>TQ</del> QMLKHADFP <del>GS</del> NNGTG <del>GF</del> FQ <del>TI</del> VGLKIR <del>DL</del> VEQLTAS <del>KAE</del> | 344 |
| consensus                 | y gnev lv emdggqfdrldeliyveshlsnls kfygevtq qmlkhadfp gsnngtg fgtivglkirdl eq as ae                                                                                                                    |     |
| gi 255646270 spot 832 PRK | TPV <del>AKKA</del>                                                                                                                                                                                    | 407 |
| gi 1885326 spot 840 PRK   | TPV <del>AKKA</del>                                                                                                                                                                                    | 351 |
| consensus                 | tpv a                                                                                                                                                                                                  |     |

**D**

Figure S2. Cont.

|                               |                                                                                        |     |
|-------------------------------|----------------------------------------------------------------------------------------|-----|
| gi 225449497 spot 355 HSC70-1 | MACKGE.....GPAIGIDLGTITSCVGVVQHDRVEITANDQGNRTTPSVAFDTT.ERLIGDAAKNQVAMNPNNTVFDA         | 73  |
| gi 225449497 spot 361 HSC70-1 | MACKGE.....GPAIGIDLGTITSCVGVVQHDRVEITANDQGNRTTPSVAFDTT.ERLIGDAAKNQVAMNPNNTVFDA         | 73  |
| gi 225573627 spot 358 HSC70-2 | MACKGE.....GPAIGIDLGTITSCVGVVQHDRVEITANDQGNRTTPSVAFDTT.ERLIGDAAKNQVAMNPNNTVFDA         | 73  |
| gi 225434984 spot 367 HSC70-2 | MACKGE.....GPAIGIDLGTITSCVGVVQHDRVEITANDQGNRTTPSVAFDTT.ERLIGDAAKNQVAMNPNNTVFDA         | 73  |
| gi 147805297 spot 332 cpHSP70 | MVRKASFHVVNEKVVIGDLGTTISAAAMEGGKPTITVNAEGORTTPSVVAYTKNGDMVGCIAARCAVNVNPNNTFESV         | 80  |
| consensus                     | m k g d l g t t s v i n g r t t p s v a t l g a k q n p n t f                          |     |
| gi 225449497 spot 355 HSC70-1 | KRLIGRRFSDASVQSDIKHWSFKVVPFGDKPMITVYKGEDKQFAAEETISSMVLTKMRETAAYLGSTVKNNAVVTVPAY        | 153 |
| gi 225449497 spot 361 HSC70-1 | KRLIGRRFSDASVQSDIKHWSFKVVPFGDKPMITVYKGEDKQFAAEETISSMVLTKMRETAAYLGSTVKNNAVVTVPAY        | 153 |
| gi 225573627 spot 358 HSC70-2 | KRLIGRRFSDASVQSDIKHWSFKVVPFGDKPMITVYKGEDKQFAAEETISSMVLTKMRETAAYLGSTVKNNAVVTVPAY        | 153 |
| gi 225434984 spot 367 HSC70-2 | KRLIGRRFSDSSVQSDIKLWPEKVIIPGPGDKPMIVVYKGEKQFAAEETISSMVLTKMRETAAYLGSTVKNNAVVTVPAY       | 153 |
| gi 147805297 spot 332 cpHSP70 | KRLIGRKMD..EVGEEAKQVSKVWRDENG..VKLECPVLAKFAAEETISQVLRKLADDKSKFNDKVKTKNAVVTVPAY         | 156 |
| consensus                     | kr igr v k kv k faaeetis vl k a l v avvtvpay                                           |     |
| gi 225449497 spot 355 HSC70-1 | FNDSQROATKDAGVIAGLNVMRIINEPTAAATAYGLDKKATSVGKKNVLI FDLGGGTDFVSLITIEEGHFEVKATAGDTH      | 233 |
| gi 225449497 spot 361 HSC70-1 | FNDSQROATKDAGVIAGLNVMRIINEPTAAATAYGLDKKATSVGKKNVLI FDLGGGTDFVSLITIEEGHFEVKATAGDTH      | 233 |
| gi 225573627 spot 358 HSC70-2 | FNDSQROATKDAGVIAGLNVMRIINEPTAAATAYGLDKKATSVGKKNVLI FDLGGGTDFVSLITIEEGHFEVKATAGDTH      | 233 |
| gi 225434984 spot 367 HSC70-2 | FNDSQROATKDAGVIAGLNVMRIINEPTAAATAYGLDKKATSVGKKNVLI FDLGGGTDFVSLITIEEGHFEVKATAGDTH      | 233 |
| gi 147805297 spot 332 cpHSP70 | FNDSQRTATKDAGRIAGLEVLRINEPTAAATAYGFEKKNN...ETILVFDLGGGTDFVSLIEVGDGFEVFLSLISGDTH        | 232 |
| consensus                     | fndsqr atkdag iagl v riineptaa ayg kk l fdlgggtfdvs l g fev t g dth                    |     |
| gi 225449497 spot 355 HSC70-1 | LGGEDFDNRMVNHVQCFKKRKHKKITGNARSLRRIRTSOBRARKLSSTAQTITIEI...DSLYEC..IDFYSTITRARFE       | 309 |
| gi 225449497 spot 361 HSC70-1 | LGGEDFDNRMVNHVQCFKKRKHKKITGNARSLRRIRTSOBRARKLSSTAQTITIEI...DSLYEC..IDFYSTITRARFE       | 309 |
| gi 225573627 spot 358 HSC70-2 | LGGEDFDNRMVNHVQCFKKRKHKKITGNARSLRRIRTSOBRARKLSSTAQTITIEI...DSLYEC..IDFYSTITRARFE       | 309 |
| gi 225434984 spot 367 HSC70-2 | LGGEDFDNRMVNHVQCFKKRKHKKITGNARSLRRIRTSOBRARKLSSTAQTITIEI...DSLYEC..IDFYSTITRARFE       | 309 |
| gi 147805297 spot 332 cpHSP70 | LGGEDFDKRIIDWLAQNFKRDEGILLKDKQATCRITETAFAKIEISSLTQTNISLPFITATSECPKHITETITRAKFE         | 312 |
| consensus                     | lgg dfd r v q fkr d l rl e ak lss qt i eg t tra fe                                     |     |
| gi 225449497 spot 355 HSC70-1 | ELNMDLFRKCMPEVEKCLRDAKMDKSTIHDVVLVGGSTRIPKVOQLQDFFNGKELCKSINPDEAVAGAAVQAAILSGE         | 389 |
| gi 225449497 spot 361 HSC70-1 | ELNMDLFRKCMPEVEKCLRDAKMDKSTIHDVVLVGGSTRIPKVOQLQDFFNGKELCKSINPDEAVAGAAVQAAILSGE         | 389 |
| gi 225573627 spot 358 HSC70-2 | ELNMDLFRKCMPEVEKCLRDAKMDKSTIHDVVLVGGSTRIPKVOQLQDFFNGKELCKSINPDEAVAGAAVQAAILSGE         | 389 |
| gi 225434984 spot 367 HSC70-2 | ELNMDLFRKCMPEVEKCLRDAKMDKSTIHDVVLVGGSTRIPKVOQLQDFFNGKELCKSINPDEAVAGAAVQAAILSGE         | 389 |
| gi 147805297 spot 332 cpHSP70 | ELCSDLDLRLRTPVETALRDALSFKDLDBVVLVGGSTRIPKVOQLVRKMT..GKEPNVTNPNDEVALGAAVQAAGVLAC        | 390 |
| consensus                     | el dl pve lrdak v lvggstrip vq l gke npde va gaavqa l g                                |     |
| gi 225449497 spot 355 HSC70-1 | GNEKVQDLLLLDVTPLSLGLETAGGVMIVLIIPRNTTILPTKKEQVFSTYSDNCPGVLIQVYGERTRTRDNNLLCKFELSG      | 469 |
| gi 225449497 spot 361 HSC70-1 | GNEKVQDLLLLDVTPLSLGLETAGGVMIVLIIPRNTTILPTKKEQVFSTYSDNCPGVLIQVYGERTRTRDNNLLCKFELSG      | 469 |
| gi 225573627 spot 358 HSC70-2 | GNEKVQDLLLLDVTPLSLGLETAGGVMIVLIIPRNTTILPTKKEQVFSTYSDNCPGVLIQVYGERTRTRDNNLLCKFELSG      | 469 |
| gi 225434984 spot 367 HSC70-2 | GNEKVQDLLLLDVTPLSLGLETAGGVMIVLIIPRNTTILPTKKEQVFSTYSDNCPGVLIQVYGERTRTRDNNLLCKFELSG      | 469 |
| gi 147805297 spot 332 cpHSP70 | ...DVSNIIVLLDVTPLSLGLETILGGVMITKIIIPRNTTILPTKSEVVFSTAAAGCTISVEINVLQGEREFVRDNKSLGSEFLDC | 467 |
| consensus                     | v lldvtplslglet ggvmv iprntt pt k vfst d q v i v ger rdn lg f l g                      |     |
| gi 225449497 spot 355 HSC70-1 | IPPAPRGVPQITVCFDIDANGILNVSAEDKTTGCKNKITITNDKGRLSKEETIENMVQEAKEYKSEDEBHHKKVKAANKALE     | 549 |
| gi 225449497 spot 361 HSC70-1 | IPPAPRGVPQITVCFDIDANGILNVSAEDKTTGCKNKITITNDKGRLSKEETIENMVQEAKEYKSEDEBHHKKVKAANKALE     | 549 |
| gi 225573627 spot 358 HSC70-2 | IPPAPRGVPQITVCFDIDANGILNVSAEDKTTGCKNKITITNDKGRLSKEETIENMVQEAKEYKSEDEBHHKKVKAANKALE     | 549 |
| gi 225434984 spot 367 HSC70-2 | IPPAPRGVPQITVCFDIDANGILNVSAEDKTTGCKNKITITNDKGRLSKEETIENMVQEAKEYKSEDEBHHKKVKAANKALE     | 549 |
| gi 147805297 spot 332 cpHSP70 | IPPAPRGVPQIEVCFDIDANGILSVTAVDKGTGKKQDITITIG.ASTIPNDEVDRMVKEAEKFAKEKFKRDAIDTKNQAD       | 546 |
| consensus                     | ippaprgvpqi v fdidangil v a dk tg k itit l e mv eaek ed e kn                           |     |
| gi 225449497 spot 355 HSC70-1 | NYAYNMRNTVKDEKISAKLEPPADKKKKIEDAVEQAIQWLDSNQLAAEDEFEDKMKELIESICNPIIAKMYOCAGGPDACAGA    | 629 |
| gi 225449497 spot 361 HSC70-1 | NYAYNMRNTVKDEKISAKLEPPADKKKKIEDAVEQAIQWLDSNQLAAEDEFEDKMKELIESICNPIIAKMYOCAGGPDACAGA    | 629 |
| gi 225573627 spot 358 HSC70-2 | NYAYNMRNTVKDEKISAKLEPPADKKKKIEDAVEQAIQWLDSNQLAAEDEFEDKMKELIESICNPIIAKMYOCAG.GEMGA.G    | 627 |
| gi 225434984 spot 367 HSC70-2 | NYAYNMRNTIKDEKIGAKLTIPADKKKKIEDAIDQAIQWLDSNQLAAEDEFEDKMKELIESICNPIIAKMYOCAG.PDMGG.P    | 627 |
| gi 147805297 spot 332 cpHSP70 | SVVYQTEKQLK...ELGDKVPAVKKVKEAKLKKELKDAISSG..STTQTKPAAALNQEVMOISQSLYSQACAPGACAGA        | 622 |
| consensus                     | y k k k k e s d m l i y ag g                                                           |     |
| gi 225449497 spot 355 HSC70-1 | MDDDGPSAGGSAGGPKIEEVD                                                                  | 650 |
| gi 225449497 spot 361 HSC70-1 | MDDDGPSAGGSAGGPKIEEVD                                                                  | 650 |
| gi 225573627 spot 358 HSC70-2 | MEDDAF..AGGSAGGPKIEEVD                                                                 | 647 |
| gi 225434984 spot 367 HSC70-2 | MEDDVFPASGSAGGPKIEEVD                                                                  | 648 |
| gi 147805297 spot 332 cpHSP70 | GAAGSTDSKPDGDVIDADFTES                                                                 | 644 |
| consensus                     | g                                                                                      |     |

Figure S2. Cont.



|                           |                                                                                        |      |
|---------------------------|----------------------------------------------------------------------------------------|------|
| gi 9294618 spot 170 PreP1 | MSLTSSSTAALRVPSRNLRRRISSPSVAGRLLRLRRGLRIPSAAVRSVNGQFSRLSVRAVATQAPAPLYPDVGQDEAEKLGFE    | 80   |
| gi 9294618 spot 179 PreP1 | MSLTSSSTAALRVPSRNLRRRISSPSVAGRLLRLRRGLRIPSAAVRSVNGQFSRLSVRAVATQAPAPLYPDVGQDEAEKLGFE    | 80   |
| consensus                 | msltssstaalrvpsrnlrrrissp svagrllrlrrglripsaavrsvngqfsrlsvravatqapaplypdvggqdeaeaklgfe |      |
| gi 9294618 spot 170 PreP1 | KVSEEFISECKSKAILFKHKKTGCEVMSVSNEDENKVFVGVFRTPPKDDSTGIPHILEHSVLGSRKYPVKKEPFVELLKGS      | 160  |
| gi 9294618 spot 179 PreP1 | KVSEEFISECKSKAILFKHKKTGCEVMSVSNEDENKVFVGVFRTPPKDDSTGIPHILEHSVLGSRKYPVKKEPFVELLKGS      | 160  |
| consensus                 | kvseefiseckskailfkhhktgcevmsvsnedenkfvfgvfrtppkdstgiphilehsvlgsrkypvkepfvellkgs        |      |
| gi 9294618 spot 170 PreP1 | LHTFLNAFTYPDRTCYPVASTNTKDFYNLVVDVLDVAVFFPKCVDDAHTFQOEGWHYELNDPSEDISYKGVVFNEMKGVYS      | 240  |
| gi 9294618 spot 179 PreP1 | LHTFLNAFTYPDRTCYPVASTNTKDFYNLVVDVLDVAVFFPKCVDDAHTFQOEGWHYELNDPSEDISYKGVVFNEMKGVYS      | 240  |
| consensus                 | lhtflnaftypdrtcypvastntkdfynlvdvyldavffpkcvddahtfqogegwhyelndpsedis ykgvvfnemkgvys     |      |
| gi 9294618 spot 170 PreP1 | QPDNILGRIAQQALSPENTYGVDSGGDPKDI PNLTFFEEFKEFHRQYYHPSNARIWIFYGDDDPVHRLVRLSEYLDMEFASP    | 320  |
| gi 9294618 spot 179 PreP1 | QPDNILGRIAQQALSPENTYGVDSGGDPKDI PNLTFFEEFKEFHRQYYHPSNARIWIFYGDDDPVHRLVRLSEYLDMEFASP    | 320  |
| consensus                 | qpdnilgriaqqalspentygvdsggdpkdipnltf eefkefhrqyyhpsnariwfygdddpvhrlvrlseyldmfeasp      |      |
| gi 9294618 spot 170 PreP1 | SPNSSKIKFQKLFSEPVRLVEKYPAGRDGDLKKHMLCVNWLLSEKPLDLQTQLALGFLDHLMLGTPASPLRKILLESGL        | 400  |
| gi 9294618 spot 179 PreP1 | SPNSSKIKFQKLFSEPVRLVEKYPAGRDGDLKKHMLCVNWLLSEKPLDLQTQLALGFLDHLMLGTPASPLRKILLESGL        | 400  |
| consensus                 | spnsskikfqlfsepvrlveky pagrdgdlkkhmlcvnwllsekpdlqltqlalglf dhlmlgt pasplr killesgl     |      |
| gi 9294618 spot 170 PreP1 | GEALVSSGLSDELLQPFQIGLKVSEENVQKVEELIMDTLKKLAEEGFDNDAVEASMTNIEFSLRENNTGSPFRGLSLM         | 480  |
| gi 9294618 spot 179 PreP1 | GEALVSSGLSDELLQPFQIGLKVSEENVQKVEELIMDTLKKLAEEGFDNDAVEASMTNIEFSLRENNTGSPFRGLSLM         | 480  |
| consensus                 | gealvssglsdellqpqfiglkgvseenvqkveelimdtlkklaeegfndaveasmntiefslrenntgspfrglslm         |      |
| gi 9294618 spot 170 PreP1 | LQSISKWIYDMDPFEPLKYTEPLKALKTRIAEEGSKAVFSPLIEKLILNNSHRVTIEMQPDPEKATQEEVEEKNILEKVK       | 560  |
| gi 9294618 spot 179 PreP1 | LQSISKWIYDMDPFEPLKYTEPLKALKTRIAEEGSKAVFSPLIEKLILNNSHRVTIEMQPDPEKATQEEVEEKNILEKVK       | 560  |
| consensus                 | lqsiskwiymdpfeplkyteplkalktriaeeegskavf splieklilnns hrvtiemqpdpek atqeeveeknilekvk    |      |
| gi 9294618 spot 170 PreP1 | AAMTEEDLAELARATEELKLKQETPDPEALRCVPSNLNGDIPKEPTYVPTEVGDINGVKVLRHDLFTNDIITYEVVFDI        | 640  |
| gi 9294618 spot 179 PreP1 | AAMTEEDLAELARATEELKLKQETPDPEALRCVPSNLNGDIPKEPTYVPTEVGDINGVKVLRHDLFTNDIITYEVVFDI        | 640  |
| consensus                 | aamteedlaelarateelklkqetpdpealrcvpsnlng dipkeptyvp tevgdingvkv lrhdlftndii ytevvfdi    |      |
| gi 9294618 spot 170 PreP1 | GSCLKHELLPLVPLFCQSLLEMGTKDLTFVQLNQLIGRKTGGISVYPLTSSVRGKDEPCSKIIVRGKSMAGRADDLFNLMN      | 720  |
| gi 9294618 spot 179 PreP1 | GSCLKHELLPLVPLFCQSLLEMGTKDLTFVQLNQLIGRKTGGISVYPLTSSVRGKDEPCSKIIVRGKSMAGRADDLFNLMN      | 720  |
| consensus                 | gslkhellplvplfcqsllemgtkdltfvqlnqligrktggisv ypl tssvrgkdep cskii vrgksmagraddlfnlmn   |      |
| gi 9294618 spot 170 PreP1 | CLLQEVQFTDQQRFKQFVSQSRARMENLRGSGHGIAAARMADAMLNIAAGWMSEQMGGLSYLEFLHLEKKVDEDWEGISS       | 800  |
| gi 9294618 spot 179 PreP1 | CLLQEVQFTDQQRFKQFVSQSRARMENLRGSGHGIAAARMADAMLNIAAGWMSEQMGGLSYLEFLHLEKKVDEDWEGISS       | 800  |
| consensus                 | cllqevqftdqqr fkgfvsqsrarmenlrsgshgiaaarmadaml niaagwmseqm ggl syleflhlekkvdedwegiss   |      |
| gi 9294618 spot 170 PreP1 | SLEEIRRSLLARNGCIVNMTADGKSLTNVEKSAKFLDLLPENPSGGLVTWDGRLPLRNEAIVIPTQVNVYVKGAGNIYST       | 880  |
| gi 9294618 spot 179 PreP1 | SLEEIRRSLLARNGCIVNMTADGKSLTNVEKSAKFLDLLPENPSGGLVTWDGRLPLRNEAIVIPTQVNVYVKGAGNIYST       | 880  |
| consensus                 | sleeirrsllarngcivnmtadgksltnveksakfldll penpsgg lvtwdgrlplrneaiviptqvnvyvkgagniyst     |      |
| gi 9294618 spot 170 PreP1 | GYELDGSAYVISKHISNTWLWDRVRVSGGAYGGFCDFDSHSGVFSYLSYRDPNLLKTLTDIYDGTGDFLRGLDQVDETITK      | 960  |
| gi 9294618 spot 179 PreP1 | GYELDGSAYVISKHISNTWLWDRVRVSGGAYGGFCDFDSHSGVFSYLSYRDPNLLKTLTDIYDGTGDFLRGLDQVDETITK      | 960  |
| consensus                 | gyeldgsayviskhisntwldr vrvsggayggfcdf dshsgv fsysyrdpnllktldi ydgtgd flrgldv dgetitk   |      |
| gi 9294618 spot 170 PreP1 | AIIGTIGDVDSYQLPDAKGYSSLLRHLLGVTDEERQKRKEIILTTSLKDFKDFQAQIDVVRDKGVAVAVASAEDIDAANN       | 1040 |
| gi 9294618 spot 179 PreP1 | AIIGTIGDVDSYQLPDAKGYSSLLRHLLGVTDEERQKRKEIILTTSLKDFKDFQAQIDVVRDKGVAVAVASAEDIDAANN       | 1040 |
| consensus                 | aiigtigdvdsyqlpdakgyssllrhllgvtdeerqrkreei lttslkdfkdfaqaidvvr dkgvavavasaedidaann     |      |
| gi 9294618 spot 170 PreP1 | ERSNFFFEVKA                                                                            | 1051 |
| gi 9294618 spot 179 PreP1 | ERSNFFFEVKA                                                                            | 1051 |
| consensus                 | ersnffevkka                                                                            |      |

F

**Figure S2.** Multiple alignment of the amino acid sequences from proteoforms by using DNAMAN software (Lynnon Corporation, QC, Canada). (A) glutamine synthetase isoform GS1c (GS1), with 100% identities; (B) transketolase (TK), with 84.41% identities; (C) RuBisCO large subunit-binding protein subunit (RBP), with 72.68% identities; (D) phosphoribulokinase (PRK), with 80.64% identities; (E) heat shock protein 70 (Hsp70), with 86.09% identities; (F) zinc metalloprotease (insulinase family), homologous to presequence protease 1 (PreP1), with 100% identities. The gi number, spot number, and protein name of the presented proteins are shown on the left.

|                   |    |                                                              |  |
|-------------------|----|--------------------------------------------------------------|--|
| gi 71361902 GS1b  | 1  | -----HALLT                                                   |  |
| gi 71361904 GS1c  | 1  | -----HALLT                                                   |  |
| gi 71361900 GS1a  | 1  | -----HALLT                                                   |  |
| gi 40317420 GS-e1 | 1  | -----HSPLA                                                   |  |
| gi 40317422 GS-e2 | 1  | -----HSPLA                                                   |  |
| gi 40317416 GS-r1 | 1  | -----HASLA                                                   |  |
| gi 40317418 GS-r2 | 1  | -----HASLA                                                   |  |
| gi 71362638 GS2b  | 1  | MAQAUPAHQCQUGURSAUPARQAGRVUGURATARATSGFKULALGPETTGUIRQH      |  |
| gi 71362640 GS2c  | 1  | MAQAUPAHQCQUGURSAUPARQAGRVUGURATARATSGFKULALGPETTGUIRQH      |  |
| gi 71362455 GS2a  | 1  | MAQAUPAHQCQUGURSAUPARQAGRVUGURATARATSGFKULALGPETTGUIRQH      |  |
| consensus         | 1  | MAQAUPAHQCQUGURSAUPARQAGRVUGURATARATSGFKULALGPETTGUIRQH      |  |
| gi 71361902 GS1b  | 6  | DLNLDLTOSTEKI IAEYI WGGSGHDLRSKARTLPGPUDPSKLPKUNYDGSSTGQAPG  |  |
| gi 71361904 GS1c  | 6  | DLNLDLTOSTEKI IAEYI WGGSGHDLRSKARTLPGPUDPSKLPKUNYDGSSTGQAPG  |  |
| gi 71361900 GS1a  | 6  | DLNLDLTOSTEKI IAEYI WGGSGHDLRSKARTLPGPUDPSKLPKUNYDGSSTGQAPG  |  |
| gi 40317422 GS-e2 | 6  | DLNLDLTOSTEKI IAEYI WGGSGHDLRSKARTLPGPUDPSKLPKUNYDGSSTGQAPG  |  |
| gi 40317416 GS-r1 | 6  | DLNLDLTOSTEKI IAEYI WGGSGHDLRSKARTLPGPUDPSKLPKUNYDGSSTGQAPG  |  |
| gi 40317418 GS-r2 | 6  | DLNLDLTOSTEKI IAEYI WGGSGHDLRSKARTLPGPUDPSKLPKUNYDGSSTGQAPG  |  |
| gi 71362638 GS2b  | 61 | QLLDHDTTPTDKI IAEYI WGGSGIDLRSKARTISKPUEDPSKLPKUNYDGSSTGQAPG |  |
| gi 71362640 GS2c  | 61 | QLLDHDTTPTDKI IAEYI WGGSGIDLRSKARTISKPUEDPSKLPKUNYDGSSTGQAPG |  |
| gi 71362455 GS2a  | 61 | QLLDHDTTPTDKI IAEYI WGGSGIDLRSKARTISKPUEDPSKLPKUNYDGSSTGQAPG |  |
| consensus         | 61 | QLLDHDTTPTDKI IAEYI WGGSGIDLRSKARTISKPUEDPSKLPKUNYDGSSTGQAPG |  |

Cytosolic GS1

Plastidic GS2

Cytosolic GS1

Plastidic GS2

**Figure S3. Cont.**

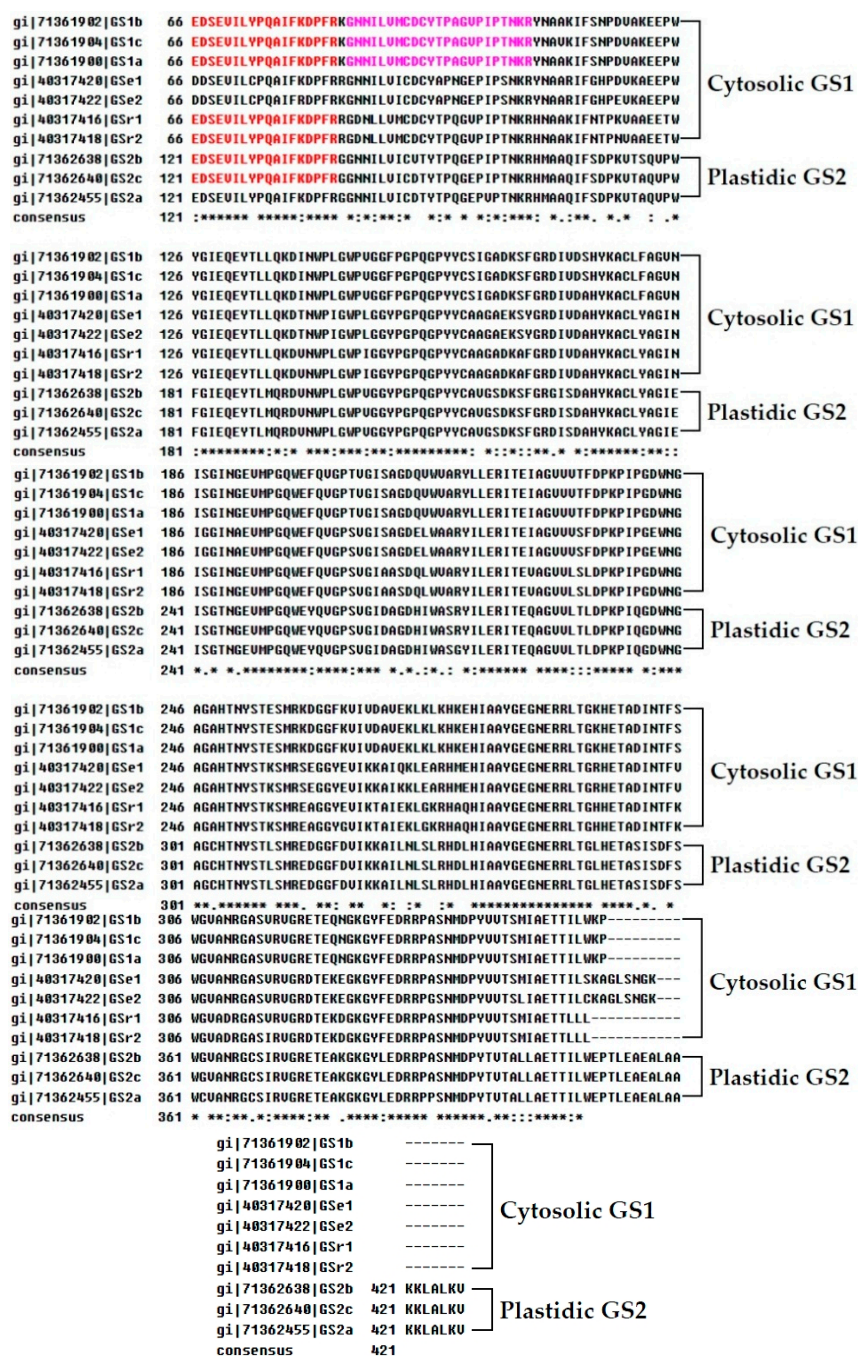

**Figure S3.** The alignment analysis between the MS-identified peptides from two proteoforms of GS1 (spots 795 and 806) and the amino acid sequences of the ten glutamine synthetase (GS) isozymes in wheat (*Triticum aestivum* L.). The amino acid sequences from wheat used for the multiple sequence alignment were from NCBI protein database (<http://www.ncbi.nlm.nih.gov/protein/>) and submitted by Bernard *et al.* [36]. The accession numbers and names of the GS isozymes were listed on the left, and the subfamilies were shown on the right of the amino acid sequences. The asterisk indicates completely conserved residues; colon indicates highly conserved residues; dot indicates a weak conservative region. The MS-identified peptides from spots 795, 806 and both were highlighted in red, blue, and purple fonts, respectively. The results showed that the MS-identified peptides were well aligned with cytosolic GS1, but not plastidic GS2. The detailed information of the identified peptides can be found in Table S1.



**Figure S4.** The alignment analysis between the MS-identified peptides of phosphoglycerate kinase (PGK) from *Ricinus communis* and the amino acid sequences of the eight putative protein products encoded from four Pgk genes in *Oryza sativa* sp. Japonica. The amino acid sequences from *O. sativa* sp. Japonica used for the multiple sequence alignment were from GABI primary database (<https://www.gabipd.org>) by using the TIGR ID provided by Joshi *et al.* [37]. The detailed accession numbers and names of the PGK isozymes were listed on the left, and the subcellular locations were shown on the right of the amino acid sequences. The asterisk indicates completely conserved residues; colon indicates highly conserved residues; dot indicates a weak conservative region; the short line indicates the vacancies residues of optimal sequence alignment. The identified peptides of PGK identified from *Ricinus communis* were highlighted in red fonts. The results showed that the unique matched peptides could only be found in the three members of OsPGK3, which were predicted to be localized in chloroplast. The detailed information of the identified peptides can be found in Table S1.



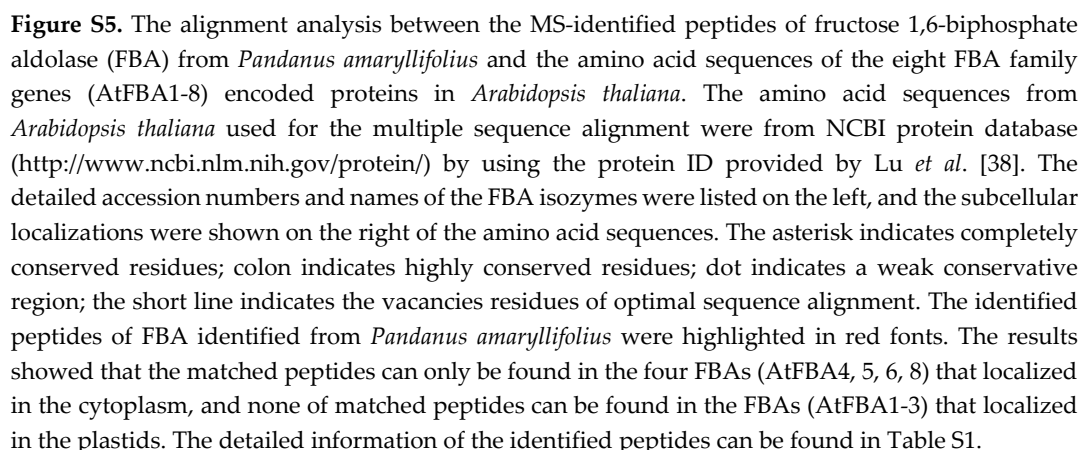

**Figure S6. Cont.**



|                           |     |                                                               |                             |
|---------------------------|-----|---------------------------------------------------------------|-----------------------------|
| g1   75313889   cpHsc70-1 | 283 | GDGUFVULSTSGDTHLGGDFDKRVUUDLAAEFKKDEGIDLLKDKQALQRLTEAAEKAKI   | Plastid stroma              |
| g1   75314568   cpHsc70-2 | 283 | GDGUFVULSTSGDTHLGGDFDKRVUUDLAAEFKKDEGIDLLKDKQALQRLTEAAEKAKI   |                             |
| g1   75299484   mtHsc70-1 | 256 | SSGUFVUKATGDFGLGGDFDNLLEVLUNEFKRSNDHIDTKMDLALQRLREAAEKAKI     | Mitochondrion matrix        |
| g1   75311081   mtHsc70-2 | 261 | SSGUFVUKATGDFGLGGDFDNLLEVLUNEFKTEGIDLANDRLALQRLREAAEKAKI      |                             |
| g1   18206379   B1P-1     | 244 | DNGUFVULSTNGDTHLGGDFDHRUMEFYIKLKKKHQKIDSKDNKALGLRRECEAKR      | Endoplasmic reticulum lumen |
| g1   12643245   B1P-2     | 244 | DNGUFVULSTNGDTHLGGDFDHRUMEFYIKLKKKHQKIDSKDNKALGLRRECEAKR      |                             |
| g1   75329119   B1P-3     | 258 | DNGUFVULSTSGDTHLGGDFDHRUMYFIKLUKKKYNKIDSKDNKALGLRRECEAKR      | Cytoplasm                   |
| g1   15241840   Hsc70-1   | 219 | EEGIFVUKATAGDTHLGGDFDHRUMHNFVDFEKKNNKIDSGNPRALRLATACERAKR     |                             |
| g1   12644165   Hsc70-2   | 219 | EEGIFVUKATAGDTHLGGDFDHRUMHNFVDFEKKNNKIDSGNPRALRLATACERAKR     | Unknown                     |
| g1   18206367   Hsc70-3   | 219 | EEGIFVUKATAGDTHLGGDFDHRUMHNFVDFEKKNNKIDSGNPRALRLATACERAKR     |                             |
| g1   75308864   Hsp70t-1  | 219 | EEGIFVUKATAGDTHLGGDFDHRUMHNFVDFEKKNNKIDSGNPRALRLATACERAKR     | Cytoplasm                   |
| g1   75311168   Hsp70t-2  | 219 | EEGIFVUKATAGDTHLGGDFDHRUMHNFVDFEKKNNKIDSGNPRALRLATACERAKR     |                             |
| g1   75313114   Hsp70b    | 218 | EEGUFVUKATAGDTHLGGDFDHRUMHNFVDFEKKNNKIDSGNPRALRLATACERAKR     | Unknown                     |
| g1   75313546   Hsp70t-2  | 218 | EEGUFVUKATAGDTHLGGDFDHRUMHNFVDFEKKNNKIDSGNPRALRLATACERAKR     |                             |
| consensus                 | 381 | AGGUSQIKALAG-SPIGGEDILQNTIRHAPPNEEASG-----LLRVAQDAQTH         |                             |
|                           |     | * : : : * : : : * : : : * : : : * : : : * : : : *             |                             |
| g1   75313889   cpHsc70-1 | 343 | ELSSLTQTNMSLPFITATADGPKHITETLIRAKFEELCSDLLDRVTPUENSLDAKL SF   | Plastid stroma              |
| g1   75314568   cpHsc70-2 | 343 | ELSSLTQTNMSLPFITATADGPKHITETLIRAKFEELCSDLLDRVTPUENSLDAKL SF   |                             |
| g1   75299484   mtHsc70-1 | 316 | ELSSLTQTTEINLPFITADASGAKHLNITLRSKFEGUGKLIERTSPQCMLKDAQUTI     | Mitochondrion matrix        |
| g1   75311081   mtHsc70-2 | 321 | ELSSLTQTTEINLPFITADASGAKHLNITLRSKFETLUNHILERTDPCKMLKDAQUTI    |                             |
| g1   18206379   B1P-1     | 304 | ALSSQHQURVEIESLFDGUD----FSEPLTRARFEELNIDLFRKTHPUKKAANDAGLQK   | Endoplasmic reticulum lumen |
| g1   12643245   B1P-2     | 304 | ALSSQHQURVEIESLFDGUD----FSEPLTRARFEELNIDLFRKTHPUKKAANDAGLQK   |                             |
| g1   75329119   B1P-3     | 318 | SLSNHQURVEIESLFDGUD----FSEPLTRARFEELNIDLFRKTHPUKKAANDAGLQK    | Cytoplasm                   |
| g1   15241840   Hsc70-1   | 279 | TLSSTAQTITIEIDSLVEGID----FVSTITRAREFEELNIDLFRKTHPUKKAANDAGLQK |                             |
| g1   12644165   Hsc70-2   | 279 | TLSSTAQTITIEIDSLVEGID----FVSTITRAREFEELNIDLFRKTHPUKKAANDAGLQK | Unknown                     |
| g1   18206367   Hsc70-3   | 279 | TLSSTAQTITIEIDSLVEGID----FVSTITRAREFEELNIDLFRKTHPUKKAANDAGLQK |                             |
| g1   75308864   Hsp70t-1  | 279 | TLSSTAQTITIEIDSLVEGID----FVSTITRAREFEELNIDLFRKTHPUKKAANDAGLQK | Cytoplasm                   |
| g1   75311168   Hsp70t-2  | 279 | TLSSTAQTITIEIDSLVEGID----FVSTITRAREFEELNIDLFRKTHPUKKAANDAGLQK |                             |
| g1   75313114   Hsp70b    | 278 | TLSSTAQTITIEIDSLVEGID----FVSTITRAREFEELNIDLFRKTHPUKKAANDAGLQK | Unknown                     |
| g1   75313546   Hsp70t-2  | 296 | RLTDQENQIEVDLGNCKNIS-----KULDLRFEFVUKFEECEERLUVCQLDARVUC      |                             |
| consensus                 | 361 | * : : : * : : : * : : : * : : : * : : : * : : : *             |                             |
| g1   75313889   cpHsc70-1 | 403 | KDIDEUILUGGSTRIPAUQGLURKUT-GKEPNUTUNPDEUVALGAUQAQULAG-----D   | Plastid stroma              |
| g1   75314568   cpHsc70-2 | 403 | KDIDEUILUGGSTRIPAUQGLURKUT-GKEPNUTUNPDEUVALGAUQAQULAG-----D   |                             |
| g1   75299484   mtHsc70-1 | 376 | KEUDEULLUGGSTRIPKUVQIEUSEIF-GKSPCKUNPDEAVAGAAIIGGGLILG-----D  | Mitochondrion matrix        |
| g1   75311081   mtHsc70-2 | 381 | KEUDEULLUGGSTRIPKUVQIEUSEIF-GKSPCKUNPDEAVAGAAIIGGGLILG-----D  |                             |
| g1   18206379   B1P-1     | 360 | SQIDEIULUGGSTRIPKUVQILLKDFFEKPEPKNGUNPDEAVAGAAUQGGILSGEGG-DE  | Endoplasmic reticulum lumen |
| g1   12643245   B1P-2     | 360 | SQIDEIULUGGSTRIPKUVQILLKDFFEKPEPKNGUNPDEAVAGAAUQGGILSGEGG-DE  |                             |
| g1   75329119   B1P-3     | 374 | SQIDEIULUGGSTRIPKUVQILLKDFFDGKEPKNGUNPDEAVAGAAUQGGILSGEGG-EE  | Cytoplasm                   |
| g1   15241840   Hsc70-1   | 335 | STUHDVULUGGSTRIPKUVQILLDFEFNGKELCKSNPDEAVAGAAUQAAILSGEEN-EK   |                             |
| g1   12644165   Hsc70-2   | 335 | STUHEIULUGGSTRIPKUVQILLDFEFNGKELCKSNPDEAVAGAAUQAAILSGEEN-EK   | Unknown                     |
| g1   18206367   Hsc70-3   | 335 | NSIDVULUGGSTRIPKUVQILLDFEFNGKELCKSNPDEAVAGAAUQAAILSGEEN-EK    |                             |
| g1   75308864   Hsp70t-1  | 335 | SMUHDVULUGGSTRIPKUVQILLDFEFNGKELCKSNPDEAVAGAAUQAAILSGEEN-EK   | Cytoplasm                   |
| g1   75311168   Hsp70t-2  | 335 | SSUHDVULUGGSTRIPKUVQILLDFEFNGKELCKSNPDEAVAGAAUQAAILSGEEN-EK   |                             |
| g1   75313114   Hsp70b    | 334 | SSUHDVULUGGSTRIPKUVQILLDFEFNGKELCKSNPDEAVAGAAUQAAILSGEEN-EK   | Unknown                     |
| g1   75313546   Hsp70t-2  | 351 | GIDIDLIMUGGCVYIPKURTITKWKCKDEYKUNPDEAVAGAAUQAAILSGEEN-EK      |                             |
| consensus                 | 421 | : : : : : * : : : : * : : : : * : : : : * : : : : * : : : : * |                             |
| g1   75313889   cpHsc70-1 | 457 | USDVULLDVTPLSLGLTETAGGUTHIIPRNTTIPKTSKFEVSTAGDGQTSVFINVLQGER  | Plastid stroma              |
| g1   75314568   cpHsc70-2 | 457 | USDVULLDVTPLSLGLTETAGGUTHIIPRNTTIPKTSKFEVSTAGDGQTSVFINVLQGER  |                             |
| g1   75299484   mtHsc70-1 | 430 | UKDILLLDVUPLSLGLTETAGGUTHIIPRNTTIPKTSKFEVSTAGDGQTSVFINVLQGER  | Mitochondrion matrix        |
| g1   75311081   mtHsc70-2 | 435 | UKELLILLDVUPLSLGLTETAGGUTHIIPRNTTIPKTSKFEVSTAGDGQTSVFINVLQGER |                             |
| g1   18206379   B1P-1     | 419 | TKDILLLDVUPLSLGLTETAGGUTHIIPRNTTIPKTSKFEVSTAGDGQTSVFINVLQGER  | Endoplasmic reticulum lumen |
| g1   12643245   B1P-2     | 419 | TKDILLLDVUPLSLGLTETAGGUTHIIPRNTTIPKTSKFEVSTAGDGQTSVFINVLQGER  |                             |
| g1   75329119   B1P-3     | 433 | TQMLLLDVUPLSLGLTETAGGUTHIIPRNTTIPKTSKFEVSTAGDGQTSVFINVLQGER   | Cytoplasm                   |
| g1   15241840   Hsc70-1   | 394 | UQDILLLDVTPLSLGLTETAGGUTHIIPRNTTIPKTSKFEVSTAGDGQTSVFINVLQGER  |                             |
| g1   12644165   Hsc70-2   | 394 | UQDILLLDVTPLSLGLTETAGGUTHIIPRNTTIPKTSKFEVSTAGDGQTSVFINVLQGER  | Unknown                     |
| g1   18206367   Hsc70-3   | 394 | UQDILLLDVTPLSLGLTETAGGUTHIIPRNTTIPKTSKFEVSTAGDGQTSVFINVLQGER  |                             |
| g1   75308864   Hsp70t-1  | 394 | UQDILLLDVTPLSLGLTETAGGUTHIIPRNTTIPKTSKFEVSTAGDGQTSVFINVLQGER  | Cytoplasm                   |
| g1   75311168   Hsp70t-2  | 394 | UQDILLLDVTPLSLGLTETAGGUTHIIPRNTTIPKTSKFEVSTAGDGQTSVFINVLQGER  |                             |
| g1   75313114   Hsp70b    | 393 | UQDILLLDVUPLSLGLTETAGGUTHIIPRNTTIPKTSKFEVSTAGDGQTSVFINVLQGER  | Unknown                     |
| g1   75313546   Hsp70t-2  | 411 | SLDLITIQATPLAUCURANGHIFIPRNTTIPKTSKFEVSTAGDGQTSVFINVLQGER     |                             |
| consensus                 | 481 | : : : : : * : : : : * : : : : * : : : : * : : : : * : : : : * |                             |
| g1   75313889   cpHsc70-1 | 517 | EFURDNKSLGSFRLLGIPPAFRGUPQIEUTCFIDANGILSUSADKGTGKKQDITITGA-   | Plastid stroma              |
| g1   75314568   cpHsc70-2 | 517 | EFURDNKSLGSFRLLGIPPAFRGUPQIEUTCFIDANGILSUSADKGTGKKQDITITGA-   |                             |
| g1   75299484   mtHsc70-1 | 490 | EMADNKLGFEDLUGIPPAFRGUPQIEUTCFIDANGITTSADKGTGKKQDITITGA-      | Mitochondrion matrix        |
| g1   75311081   mtHsc70-2 | 495 | EMADNKLGFEDLUGIPPAFRGUPQIEUTCFIDANGITTSADKGTGKKQDITITGA-      |                             |
| g1   18206379   B1P-1     | 479 | SLTKDCLLKGFDLNGIPPAFRGUPQIEUTCFIDANGILNUSADKGTGKKQDITITGA-    | Endoplasmic reticulum lumen |
| g1   12643245   B1P-2     | 479 | SLTKDCLLKGFDLNGIPPAFRGUPQIEUTCFIDANGILNUSADKGTGKKQDITITGA-    |                             |
| g1   75329119   B1P-3     | 493 | SLTKDCLLKGFDLNGIPPAFRGUPQIEUTCFIDANGILNUSADKGTGKKQDITITGA-    | Cytoplasm                   |
| g1   15241840   Hsc70-1   | 454 | ARTDNNLKGFEELSGIPPAFRGUPQIEUTCFIDANGILNUSADKGTGKKQDITITGA-    |                             |
| g1   12644165   Hsc70-2   | 454 | ARTDNNLKGFEELSGIPPAFRGUPQIEUTCFIDANGILNUSADKGTGKKQDITITGA-    | Unknown                     |
| g1   18206367   Hsc70-3   | 454 | ARTDNNLKGFEELSGIPPAFRGUPQIEUTCFIDANGILNUSADKGTGKKQDITITGA-    |                             |
| g1   75308864   Hsp70t-1  | 454 | ARTDNNLKGFEELSGIPPAFRGUPQIEUTCFIDANGILNUSADKGTGKKQDITITGA-    | Cytoplasm                   |
| g1   75311168   Hsp70t-2  | 454 | ARTDNNLKGFEELSGIPPAFRGUPQIEUTCFIDANGILNUSADKGTGKKQDITITGA-    |                             |
| g1   75313114   Hsp70b    | 453 | ARTDNNLKGFEELSGIPPAFRGUPQIEUTCFIDANGILNUSADKGTGKKQDITITGA-    | Unknown                     |
| g1   75313546   Hsp70t-2  | 471 | ETUEANHLGVYKFLUGIPPAFRGUPQIEUTCFIDANGILNUSADKGTGKKQDITITGA-   |                             |
| consensus                 | 541 | : : : : : * : : : : * : : : : * : : : : * : : : : * : : : : * |                             |

**Figure S6. Cont.**

|                       |       |                                                               |                             |
|-----------------------|-------|---------------------------------------------------------------|-----------------------------|
| gi 75313889 cpHsc70-1 | 576   | STLPKDEVDQMUQEAERFAKDDKEKRDADITKNDADSUVVOTEKQLKEL---GEKIPGEV  | Plastid stroma              |
| gi 75311568 cpHsc70-2 | 576   | STLPKDEVDTMUQEAERFAKDDKEKRDADITKNDADSUVVOTEKQLKEL---GEKIPGPV  |                             |
| gi 75299484 mtHsc70-1 | 549   | GGLSDDIEINRMUKAEELHAQDKQEKQLIDLNSADTTIYSVEKSLSEY---REKIPAEI   | Mitochondrion matrix        |
| gi 75311081 mtHsc70-2 | 554   | GGLSDDIQKMUREAELHAQDKKERKELIDTKNTADTTIYSIEKSLGEY---REKIPSEI   |                             |
| gi 18206379 B1P-1     | 539   | GRLSQEEIDRMUKAEFEFAEDKKKUEKIDARNALETYVYNNKQVNDKDLADKLEGE      | Endoplasmic reticulum lumen |
| gi 12643245 B1P-2     | 539   | GRLSQEEIDRMUKAEFEFAEDKKKUEKIDARNALETYVYNNKQVNDKDLADKLEGE      |                             |
| gi 75329110 B1P-3     | 553   | GRLTFFETFEETREAEFEFAEDKINKEKIDARNKLETVYVNNKSTUADKEKLAKKISDED  | Cytoplasm                   |
| gi 15241849 Hsc70-1   | 514   | GRLSKDEIEKMUQEAKEYKSEDEEHKKKUEAKNLENVAVMNTIIDE-KIGEKLPAD      |                             |
| gi 12644165 Hsc70-2   | 514   | GRLSKDEIEKMUQEAKEYKSEDEEHKKKUEAKNLENVAVMNTIIRDE-KIGEKLPAD     | Cytoplasm                   |
| gi 18206367 Hsc70-3   | 514   | GRLSKDEIEKMUQEAKEYKSEDEEHKKKUDAKNLENVAVMNTIIRDE-KIGEKLAGD     |                             |
| gi 75308864 Hsp70t-1  | 514   | GRLSKDDIEKMUQEAKEYKSEDEEHKKKUEAKNLENVAVMNTIIRDE---MGEKLPAD    | Unknown                     |
| gi 75311168 Hsp70     | 514   | GRLSKEEIEKMUQEAKEYKAEDEEHKKKUEAKNLENVAVMNTIKDE-KIASKLDAAD     | Cytoplasm                   |
| gi 75313114 Hsp70b    | 513   | GRLSKEEIEKMUQDAEKYKAEDEQKKKUEAKNLENVAVMNTIKDE-KLAQKLTDQ       |                             |
| gi 75313546 Hsp70t-2  | 531   | RHPTUDDGHGCAQALNKKYGATLDLITLQAKH-----                         | Unknown                     |
| consensus             | 601   | . : : . : *                                                   |                             |
| gi 75313889 cpHsc70-1 | 633   | KEKVEAKLQELKDKIGSGSTQETKDAMALNQEVNQIQSLYHQPGAGGPGAGSPGGEG     | Plastid stroma              |
| gi 75311568 cpHsc70-2 | 633   | KEKVEAKLQELKEKIASGSTQETKDTHMALNQEVNQIQSLYHQPGAGGPGAGSPGGEG    |                             |
| gi 75299484 mtHsc70-1 | 606   | ASEIETAUSDRTAHAGEDUEDIKAKUEAANKAUSKIGEHHS-----KCSG            | Mitochondrion matrix        |
| gi 75311081 mtHsc70-2 | 611   | AKIEEDAVADLRSSAGDQLNETKAKTEAANKAUSKIGEHHS-----KCSG            |                             |
| gi 18206379 B1P-1     | 599   | KEKIEAATKEALEMDEHQNSEK-EEYDEKLKEUEAVCNPIITAVYQR-----SG        | Endoplasmic reticulum lumen |
| gi 12643245 B1P-2     | 599   | KEKIEAATKEALEMDEHQNSEK-EEYDEKLKEUEAVCNPIITAVYQR-----SG        |                             |
| gi 75329110 B1P-3     | 613   | KEKMEGULKEALEMLEENHNAEK-EDYDEKLKEUELUCDPUKSUYEK-----TE        | Cytoplasm                   |
| gi 15241849 Hsc70-1   | 573   | KKKIEDSIEQA IQMLEGNQLAEA-DEFEDEKMELESICNPITAKMWQG-AGGAGGPGAS  |                             |
| gi 12644165 Hsc70-2   | 573   | KKKVEDSIEFA IQMLDGNQLAEA-DEFEDEKMELESICNPITAKMWQG-AGGAGGPGAS  | Unknown                     |
| gi 18206367 Hsc70-3   | 573   | KKKIEDSIEFA IEMLANQLAEC-DEFEDEKMELESICNPITAKMWQG-AGGAGGPGAG   |                             |
| gi 75308864 Hsp70t-1  | 571   | KKKFEDSIEEV IQMLDDNQLAEA-DEFEHKKMELESUMSTIITAKMWQG-----       | Unknown                     |
| gi 75311168 Hsp70     | 573   | KKKIEDAIDQA IEMLDGNQLAEA-DEFEDEKMELESICNPITAKMWQG-AGPDHGG--AG |                             |
| gi 75313114 Hsp70b    | 572   | KQKIEKAIDET IEWIEGNQLAEV-DEFEYKLEKEGICNPITISKMWQG-----GAAG    | Cytoplasm                   |
| gi 75313546 Hsp70t-2  | ----- | -----                                                         |                             |
| consensus             | 661   |                                                               |                             |
| gi 75313889 cpHsc70-1 | 693   | ASSGD-SSSSKGGD-GDDUIDADFTDSQ----                              | Plastid stroma              |
| gi 75311568 cpHsc70-2 | 691   | SSSSDTSSSAKGGDGGDUIDADFTDSH----                               |                             |
| gi 75299484 mtHsc70-1 | 652   | SSGSD-GSSGEGTSGTEQTPAEFEFEASGSRK                              | Mitochondrion matrix        |
| gi 75311081 mtHsc70-2 | 657   | GGAP-GGSGEG--GSDQAPAEVEYUUK----                               |                             |
| gi 18206379 B1P-1     | 648   | GAPGGAGGESSFEEDESDEL-----                                     | Endoplasmic reticulum lumen |
| gi 12643245 B1P-2     | 648   | GAPG-AGGESSFEEDESDEL-----                                     |                             |
| gi 75329110 B1P-3     | 662   | -----GENEDDGDGDD-HDEL-----                                    | Cytoplasm                   |
| gi 15241849 Hsc70-1   | 631   | GMD-DDAPPASGGAG-PKIEEVD-----                                  |                             |
| gi 12644165 Hsc70-2   | 632   | GMDDEAPPASGGAG-PKIEEVD-----                                   | Cytoplasm                   |
| gi 18206367 Hsc70-3   | 629   | GMD-EDUPPSAGGAG-PKIEEVD-----                                  |                             |
| gi 75308864 Hsp70t-1  | ----- | -----                                                         | Unknown                     |
| gi 75311168 Hsp70     | 629   | GMDDDTPAGGSGGAG-PKIEEVD-----                                  | Cytoplasm                   |
| gi 75313114 Hsp70b    | 624   | GMPTDGFSSSGAAGGPKIEEVD-----                                   |                             |
| gi 75313546 Hsp70t-2  | ----- | -----                                                         | Unknown                     |
| consensus             | 721   |                                                               |                             |

**Figure S6.** The alignment analysis between the MS-identified peptides from five proteoforms of heat shock protein 70 (Hsp70) (spots 355, 361, 358, 367, and 332) and the amino acid sequences of the fourteen Hsp70 gene family encoded proteins in Arabidopsis. The amino acid sequences from Arabidopsis used for the multiple sequence alignment were from NCBI protein database (<http://www.ncbi.nlm.nih.gov/protein/>) by using the protein name provided by Sung *et al.* [39]. The detailed accession numbers and names of the HSP70 proteins were listed on the left, and the subcellular locations were shown on the right of the amino acid sequences. The asterisk indicates completely conserved residues; colon indicates highly conserved residues; dot indicates a weak conservative region; the short line indicates the vacancies residues of optimal sequence alignment. The identified peptides from spots 355, 361, 358, 367, and 332 were highlighted with red, blue, purple, yellow, and green underlines, respectively. The results showed that the unique identified peptides from all the spots 355, 361, 358, and 367 could be only matched to the Hsp70s localized in cytoplasm. In contrast, the unique identified peptides from the spot 332 could be only matched to the Hsp70s localized in chloroplast. The detailed information of the identified peptides can be found in Table S1.



Table S3. Proteoforms identified in *Hosta* “Gold standard”.

| Protein Name <sup>a</sup>                           | Identity <sup>b</sup> | Spot No. <sup>c</sup> | SCL <sup>d</sup> | Plant Species <sup>e</sup> | gi Number <sup>f</sup> | Exp. Mw (Da)/pI <sup>g</sup> | Thr. Mw (Da)/pI <sup>h</sup> | Sco <sup>i</sup> | Cov (%) <sup>j</sup> | QM <sup>k</sup> | V% ± SE / YLM |      |     |     |
|-----------------------------------------------------|-----------------------|-----------------------|------------------|----------------------------|------------------------|------------------------------|------------------------------|------------------|----------------------|-----------------|---------------|------|-----|-----|
|                                                     |                       |                       |                  |                            |                        |                              |                              |                  |                      |                 | MLM           | LENF | YLC | MLC |
| glutamine synthetase isoform GS1c (GS1)             | 100%                  | 795                   | Cyt              | <i>Triticum aestivum</i>   | 71361904               | 39,676/5.58                  | 39,445/5.41                  | 89               | 15                   | 2               |               |      |     |     |
|                                                     |                       | 806                   | Cyt              | <i>T. aestivum</i>         | 71361904               | 39,505/5.75                  | 39,445/5.41                  | 168              | 15                   | 3               |               |      |     |     |
| transketolase (TK)                                  | 84.41%                | 338                   | Chl              | <i>Nicotiana tabacum</i>   | 194396261              | 78,879/5.95                  | 80,451/6.16                  | 141              | 17                   | 10              |               |      |     |     |
|                                                     |                       | 346                   | Chl              | <i>Populus trichocarpa</i> | 224063766              | 79,837/5.87                  | 81,122/5.97                  | 337              | 13                   | 9               |               |      |     |     |
| RuBisCO large subunit-binding protein subunit (RBP) | 72.68%                | 476                   | Chl              | <i>Vitis vinifera</i>      | 225442531              | 63,140/5.18                  | 65,255/5.6                   | 474              | 17                   | 8               |               |      |     |     |
|                                                     |                       | 459                   | Chl              | <i>Sorghum bicolor</i>     | 242090109              | 66,151/4.84                  | 60,914/5.07                  | 233              | 31                   | 13              |               |      |     |     |
|                                                     |                       | 472                   | Chl              | <i>Zea mays</i>            | 223948025              | 64,795/5.24                  | 61,969/5.42                  | 524              | 30                   | 11              |               |      |     |     |
| phosphoribulokinase (PRK)                           | 80.64%                | 840                   | Chl              | <i>Pisum sativum</i>       | 1885326                | 38,189/4.99                  | 39,230/5.41                  | 113              | 13                   | 3               |               |      |     |     |
|                                                     |                       | 832                   | Chl              | <i>Glycine max</i>         | 255646270              | 38,858/4.85                  | 45,757/5.89                  | 277              | 38                   | 11              |               |      |     |     |

Table S1. Cont.

| Protein Name <sup>a</sup>                                                                | Identity <sup>b</sup> | Spot No. <sup>c</sup> | SCL <sup>d</sup> | Plant Species <sup>e</sup>  | gi Number <sup>f</sup> | Exp. Mw (Da)/pI <sup>g</sup> | Thr. Mw (Da)/pI <sup>h</sup> | Sco <sup>i</sup> | Cov (%) <sup>j</sup> | QM <sup>k</sup> | V% ± SE <sup>l</sup> YLM                                                            |      |     |     |  |
|------------------------------------------------------------------------------------------|-----------------------|-----------------------|------------------|-----------------------------|------------------------|------------------------------|------------------------------|------------------|----------------------|-----------------|-------------------------------------------------------------------------------------|------|-----|-----|--|
|                                                                                          |                       |                       |                  |                             |                        |                              |                              |                  |                      |                 | MLM                                                                                 | LENF | YLC | MLC |  |
| heat shock protein 70 kDa (Hsp70)                                                        | 86.09%                | 355                   | Cyt              | <i>V. vinifera</i>          | 225449497              | 77,129/5.15                  | 71,525/5.17                  | 1050             | 61                   | 26              | 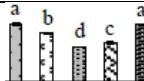 |      |     |     |  |
|                                                                                          |                       | 361                   | Cyt              | <i>V. vinifera</i>          | 225449497              | 77,663/5.10                  | 71,525/5.17                  | 959              | 58                   | 25              |  |      |     |     |  |
|                                                                                          |                       | 358                   | Cyt              | <i>Ricinus communis</i>     | 255573627              | 78,743/5.06                  | 71,276/5.14                  | 977              | 53                   | 23              |  |      |     |     |  |
|                                                                                          |                       | 367                   | Cyt              | <i>V. vinifera</i>          | 225434984              | 76,864/5.20                  | 71,589/5.17                  | 847              | 57                   | 25              |  |      |     |     |  |
|                                                                                          |                       | 332                   | Chl              | <i>V. vinifera</i>          | 147805297              | 80,390/4.75                  | 69,198/5.11                  | 722              | 36                   | 16              |  |      |     |     |  |
| zinc metalloprotease (insulinase family), homologous to presequence protease 1 (PreP1) * | 100%                  | 170                   | Chl/Mit          | <i>Arabidopsis thaliana</i> | 9294618                | 113,711/4.99                 | 118,265/5.32                 | 346              | 13                   | 11              |  |      |     |     |  |
|                                                                                          |                       | 179                   | Chl/Mit          | <i>A. thaliana</i>          | 9294618                | 113,515/5.07                 | 118,265/5.32                 | 157              | 11                   | 9               |  |      |     |     |  |

<sup>a</sup>: The name and functional categories of the proteins identified by MALDI TOF-TOF MS. Protein names marked with an asterisk (\*) have been edited by us depending on BLAST against NCBI non-redundant protein database. The detailed information of the NCBI BLAST can be found in Table S2; <sup>b</sup>: The identities of the multiple alignment of the amino acid sequences from different proteoforms. <sup>c</sup>: Assigned spot number as indicated in Figure 5; <sup>d</sup>: Protein subcellular localization predicted by softwares (YLoc, LocTree3, Plant-mPloc, ngLOC, and TargetP). SCL, subcellular location; Chl, chloroplast; Cyt, cytoplasm; Mit, mitochondria; <sup>e</sup>: The plant species that the peptides matched from. <sup>f</sup>: Database accession numbers from NCBI; <sup>g,h</sup>: Experimental (f) and theoretical (g) molecular weight (Da) and pI of identified proteins. Experimental values were calculated using Image Master 2D Platinum Software. Theoretical values were retrieved from the protein database; <sup>i</sup>: The Mascot score obtained after searching against the NCBI database; <sup>j</sup>: The amino acid sequence coverage for the identified proteins; <sup>k</sup>: The number of unique peptides identified for each protein; <sup>l</sup>: The mean values of protein spot volumes relative to total volume of all the spots. Five samples (from left to right: YLM, YLC, MLM, MLC, LENF) of various leaf regions in different development stages of *Hosta* “Gold Standard” were performed. YLM, young leaf margin; YLC, young leaf center; MLM, mature leaf margin; MLC, mature leaf center; LENF, leaf under excess nitrogen fertilization. The different small letters on the columns indicate significant differences ( $p < 0.05$ ) among the five samples as determined by one-way ANOVA. Error bars indicate  $\pm$  standard error (SE).
